# Supplementary material
Source: PubMed Central journal article supplement (PMC7290222)
Supplement: mmc1.pdf [file mmc1.pdf]

## Supplementary Material 2

### COMPILATION OF REFERENCES FROM CLASSICAL AYURVEDIC TEXTS

#### Description of Epidemics

##### ***Suśrutasaṃhitā, Sūtrasthānaṃ, 6.19-20***

कदाचिदव्यापनेष्वपि ऋतुषु कृत्याभिशापरक्षःक्रोधाधमैरुपध्वस्यन्ते जनपदाः, विषौषधिपुष्पगन्धेन वा वायुनोपनीतेनाक्रम्यते यो देशस्तत्र दोषप्रकृत्यविशेषेण कासश्वासवमथुप्रतिश्यायशिरोरुज्वरैरुपतप्यन्ते, ग्रहनक्षत्रचरितैर्वा, गृहदारशयनासनयानवाहनमणिरत्नोपकरणगर्हितलक्षणनिमित्तप्रादुर्भावैर्वा ॥

##### ***Dalhana's comments on above***

अन्ये तु कासश्वासेत्यादिपाठमन्यथा पठन्ति-

‘कासश्वासप्रतिश्यायगन्धाज्ञानभ्रमशिरोरुज्वरमसूरिकादिभिरुपतप्यन्ते’ इति, व्याख्यानयन्ति च- तत्र नासारन्धानुगतेन वायुना कासश्वासप्रतिश्यायगन्धाज्ञानभ्रमशिरोरुजः, त्वगिन्द्रियगतेन ज्वरमसूरिकादयः।

##### ***Carakasamhitā, Vimānasthānaṃ, 3.3-6***

तमुवाच भगवानात्रेयः- एवमसामान्यावतामप्येभिरग्निवेश! प्रकृत्यादिभिर्भावैर्मनुष्याणां येऽन्ये भावाः सामान्यास्तद्वैगुण्यात् समानकालाः समानलिङ्गाश्च व्याधयोऽभिनिर्वर्तमाना जनपदमुद्ध्वंसयन्ति। ते तु खल्विमे भावाः सामान्या जनपदेषु भवन्ति; तद्यथा- वायुः, उदकं, देशः, काल इति॥

##### ***Suśrutasaṃhitā, Nidānasthānaṃ, 5.33-34***

कुष्ठं ज्वरश्च शोषश्च नेत्राभिष्यन्द एव च ।

औपसर्गिकरोगाश्च सङ्क्रामन्ति नरान् नरम् ॥३४॥

##### ***Suśrutasaṃhitā, Sūtrasthānaṃ, 6.20***

तत्र, स्थानपरित्यागशान्तिकर्मप्रायश्चित्तमङ्गलजपहोमोपहारेज्याञ्जलिनमस्कारतपोनियम-  
दयादानदीक्षाभ्युपगमदेवताब्राह्मणगुरुपरैर्भवितव्यम्, एवं साधु भवति ॥२०॥

##### ***Carakasamhitā, Vimānasthānaṃ, 3.15-16***

सद्धृतस्यानुवृत्तिश्च प्रशमो गुप्तिरात्मनः॥१५॥

हितं जनपदानां च शिवानामुपसेवनम्।

##### ***Aṣṭāṅghrdayaṃ, Sūtrasthānaṃ, 1.33***

भूताद्यस्पर्शनोपायो निर्दिष्टश्च पृथक् पृथक्।

अनुत्पत्त्यै समासेन विधिरेषः प्रदर्शितः।।

## Description and Classification of Āgantujvaras

### ***Carakasamhitā, Nidānasthānaṃ, 1.17***

अथ खल्वष्टाभ्यः कारणेभ्यो ज्वरः सञ्जायते मनुष्याणां; तद्यथा- वातात्, पित्तात्, कफात्, वातपित्ताभ्यां, वातकफाभ्यां, पित्तकफाभ्यां, वातपित्तकफेभ्यः, आगन्तोरष्टमात् कारणात्॥१७॥

### ***Carakasamhitā, Cikitsāsthānaṃ, 3.111-112***

आगन्तुरष्टमो यस्तु स निर्दिष्टश्चतुर्विधः॥१११॥  
अभिघाताभिषङ्गाभ्यामभिचाराभिशापतः।

### ***Carakasamhitā, Cikitsasthanaṃ, 3.114-115***

कामशोकभयक्रोधैरभिषक्तस्य यो ज्वरः॥११४॥  
सोऽभिषङ्गाज्वरो ज्ञेयो यश्च भूताभिषङ्गजः।

### ***Carakasamhitā, Śārirasthānaṃ, 1.121***

यो भूतविषवातानामकालेनागतश्च यः।  
स्नेहशीतोष्णसंस्पर्शो मिथ्यायोग स उच्यते॥१२१॥

### ***Cakrapāṇi's comments on above***

भूताः सविषिक्रिमिपिशाचादयः।

### ***Mādhavanidānaṃ, Kuṣṭhanidānaṃ, 42-43***

औपसर्गिकरोगा इति [१] औपसर्गिकाः पापरोगादयो भूतोपसर्गजाश्च। सङ्क्रामन्ति आविशन्ति।

### ***Suśrutasamhitā, Uttarantraṃ, 39.68***

केचिद्भूताभिषङ्गोत्थं ब्रुवते विषमज्वरम् ॥६८॥

### ***Suśrutasamhitā, Nidānasthānaṃ, 5.33-34***

प्रसङ्गाद्वात्रसंस्पर्शान्निश्वासात् सहभोजनात् ।  
सहशय्यासनाच्चापि वस्त्रमाल्यानुलेपनात् ॥३३॥  
कुष्ठं ज्वरश्च शोषश्च नेत्राभिष्यन्द एव च ।  
औपसर्गिकरोगाश्च सङ्क्रामन्ति नरान् ॥३४॥

### ***Carakasamhitā, Vimānasthānaṃ, 3.115-116***

कामशोकभयाद्वायुः, क्रोधात् पित्तं, त्रयो मलाः॥११५॥  
भूताभिषङ्गात् कुप्यन्ति भूतसामान्यलक्षणाः।

***Aṣṭāṅgahṛdayam, Nidānasthānaṃ, 2.43***

ग्रहादौ सन्निपातस्य भयादौ मरुतस्त्रये ।

***Aṣṭāṅgahṛdayam, Cikitsasthānaṃ, 1.171***

ते ज्वराः केवलाः पूर्वं व्याप्यन्तेऽनन्तरं मलैः । ।

**Description of Krmis (Pathogens)**

***Carakasamhitā, Vimānasthānaṃ, 7.11***

शोणितजानां तु खलु कुष्ठैः समानं समुत्थानं; स्थानं- रक्तवाहिन्यो धमन्यः; संस्थानम्- अणवो वृत्ताश्चापादाश्च, सूक्ष्मत्वाच्चैके भवन्त्यदृश्याः

***Carakasamhitā, Vimānasthānaṃ, 7.9***

अथास्मै प्रोवाच भगवानात्रेयः- इह खल्वग्निवेश! विंशतिविधाः क्रिमयः पूर्वमुद्दिष्टा नानाविधेन प्रविभागेनान्यत्र सहजेभ्यः; ते पुनः प्रकृतिभिर्विभज्यमानाश्चतुर्विधा भवन्ति; तद्यथा- पुरीषजाः, श्लेष्मजाः, शोणितजा, मलजाश्चेति॥१॥

***Cakrapāṇi on Carakasamhitā Vimānasthānaṃ, 7.9***

अन्यत्र सहजेभ्य इत्यनेन शरीरसहजास्त्ववैकारिकाः क्रिमयो विंशतेरप्यधिका भवन्तीति दर्शयति। क्रिमीणां सञ्ज्ञा स्वशास्त्रव्यवहारसिद्धा देशान्तरप्रसिद्धा च बोद्धव्या।

***Suśrutasamhitā, Śārīrasthānaṃ, 1.16***

तथाहि भोजः- “शुभाशुभाभ्यां कर्मभ्यां प्रेरणाम्नसो गतेः। देहाद्देहान्तरं याति क्रिमिवच्छाश्वतोऽव्ययः॥

**Description of Sannipātajvara**

***Aṣṭāṅgahṛdayam, Nidānasthānaṃ, 2.27-33***

सर्वजो लक्षणैः सर्वैः .....

..... प्रततं कण्ठकूजनम् । ।

***Suśrutasamhitā, Uttarantraṃ, 39.35-38***

निद्रानाशो भ्रमः श्वासस्तन्द्रा सुप्ताङ्गताऽरुचिः ।

तृष्णा मोहो मदः स्तम्भो दाहः शीतं हृदि व्यथा ॥३५॥

पक्तिश्चिरेण दोषाणामुन्मादः श्यावदन्तता ।

रसना परुषा कृष्णा सन्धिमूर्धास्थिजा रुजः ॥३६॥

निर्भुग्ने कलुषे नेत्रे कर्णौ शब्दरुगन्वितौ ।

प्रलापः स्रोतसां पाकः कूजनं चेतनाच्युतिः ॥३७॥

स्वेदमूत्रपुरीषाणामल्पशः सुचिरात् स्तुतिः ॥३८॥

***Dalhana's comments on Suśrutasaṃhitā, Uttara Tantraṃ, 39.43-44***

यद्यपि तन्त्रान्तरे सन्निपातभेदास्त्रयोदश प्रोक्ताः, तथाऽपि दोषोत्कर्षापकर्षतारतम्येन धात्वावरणभेदेन च सन्निपातभेदानामानन्त्यान्नेह प्रदर्शिताः॥४३-४४॥

***Yogarātnākara, Jvara, 2-12***

शिरोर्तिकण्ठग्रहदाहमोहकम्पज्वराः रक्तसमीरणार्तिः। हनुग्रहस्तापविलापमूर्च्छाः स्यात्कण्ठकुब्जः खलु कष्टसाध्यः।।

***Bhavaprakāśa, Madhyama Khanda, 1.439-526***

कण्ठःशूकशतावरुद्धवदतिश्वासः प्रलापोरुचिर्विदाहो  
देहरुजा तृषापि च हनुस्तम्भः शिरोर्तिस्तथा।  
मोहो वेपथुना सहेति सकलं लिङ्गं त्रिदोषजवरे यत्र  
स्यात्स हि कण्ठकुब्ज उदितः प्राच्यैश्चिकित्साबुधैः।।५०५

***Jvaranirṇaya of Narayanapaṇḍita, Tridosajaprakaraṇam 1-241***

This chapter of the book deals with *sannipātajvara* in such detail that is not found in other texts. All possible classifications of *sannipātajvara* have been harmonised in this chapter.

***Carakasamhitā, Cikitsāsthānam, 3.103-109***

सन्निपातज्वरस्योर्ध्वमतो वक्ष्यामि लक्षणम्।  
क्षणे दाहः क्षणे शीतमस्थिसन्धिशिरोरुजा॥१०३॥  
सास्त्रावे कलुषे रक्ते निर्भुग्ने चापि दर्शने [२]।  
सस्वनौ सरुजौ कर्णौ कण्ठः शूकैरिवावृतः॥१०४॥  
तन्द्रा मोहः प्रलापश्च कासः श्वासोऽरुचिर्भ्रमः।  
परिदग्धा खरस्पर्शा जिह्वा स्रस्ताङ्गता परम्॥१०५॥  
ष्ठीवनं रक्तपित्तस्य कफेनोन्मिश्रितस्य च।  
शिरसो लोठनं तृष्णा निद्रानाशो हृदि व्यथा॥१०६॥  
स्वेदमूत्रपुरीषाणां चिराद्दर्शनमल्पशः।  
कृशत्वं नातिगात्राणां प्रततं कण्ठकूजनम्॥१०७॥  
कोठानां श्यावरक्तानां मण्डलानां च दर्शनम्।  
मूकत्वं स्रोतसां पाको गुरुत्वमुदरस्य च॥१०८॥  
चिरात् पाकश्च दोषाणां सन्निपातज्वराकृतिः॥१०९॥

**Carakasamhitā, Cikitsāsthānaṃ, 3.92**

शैत्यं कासोऽरुचिस्तन्द्रापिपासादाहरुग्व्यथाः।  
वातश्लेष्मोल्बणे व्याधौ लिङ्गं पित्तवरे विदुः॥९२॥

**Aṣṭāṅghrdayam, Nidānasthānaṃ, 2.34**

दोषे विबद्धे नष्टेऽग्नौ सर्वसम्पूर्णलक्षणः॥  
असाध्यः सोन्यथा कृच्छ्रो भवेद्वैकल्यदोपि वा।।

**Suśrutasamhitā, Uttarantraṃ, 39.45,46**

सप्तमे दिवसे प्राप्ते दशमे द्वादशेऽपि वा ॥४५॥  
पुनर्घोरतरो भूत्वा प्रशमं याति हन्ति वा ॥४६॥

**Cakrapāṇidatta on Carakasamhitā, Cikitsāsthānaṃ, 3.109,110**

यदुक्तं- “सन्निपातो दुःश्चिकित्सयानां” (सू.अ.२५) इति, तथा च भालुकिना- “मृत्युना सह योद्धव्यं सन्निपातं  
चिकित्सता” इति॥१०९॥-

**Jvaranirṇaya, Tridoṣaja Verse 1**

त्रयोदशापि त्रिकजाः द्वेधा द्वन्द्वजवन्मताः।  
तत्रापि प्रकृतिसमसमवेतान् वदाम्यहम्।।

**Description of the critical stage of Ojonirodha**

**Suśrutasamhitā, Uttarantraṃ, 39.43-45**

ओजो विस्रंसते यस्य पित्तानिलसमुच्छ्रयात्।  
स गात्रस्तम्भशीताभ्यां शयनेप्सुरचेतनः [१] ॥४३॥  
अपि जाग्रत् स्वपन् जन्तुस्तन्द्रालुश्च प्रलापवान्।  
संहृष्टरोमा स्रस्ताङ्गो मन्दसन्तापवेदनः ॥४४॥  
ओजोनिरोधजं तस्य जानीयात् कुशलो भिषक् ॥४५॥

**Symptoms specifically seen in Jvara based on doṣa dominance**

**Carakasamhitā, Cikitsāsthānaṃ, 3.86-87**

शीतको गौरवं तन्द्रा स्तैमित्यं पर्वणां च रुक् ॥८६॥  
शिरोग्रहः प्रतिश्यायः कासः स्वेदाप्रवर्तनम्।  
सन्तापो मध्यवेगश्च वातश्लेष्मज्वराकृतिः ॥८७॥

**Carakasamhitā, Cikitsāsthānaṃ, 17.45**

यदा स्रोतांसि संरुध्य मारुतः कफमूर्च्छितः।  
विष्वग्रजति संरुद्धस्तदा श्वासान् करोति सः।।

**Aṣṭāṅgahrdayam, Nidānasthānaṃ, 1.25**

तापहान्यरुचिपर्वशिरोरूक् पीनसश्वसनकासविबन्धाः।  
शीतजाड्यतिमिरभ्रमतन्द्राः श्लेष्मवातजनितज्वरलिङ्गम्।।

**Aṣṭāṅgahrdayam, Nidānasthānaṃ, 1.18-20**

युगपद्व्याप्तिरङ्गानां प्रलापः कटुवक्त्रता।  
नासास्यपाकः शीतेच्छा भ्रमो मूर्च्छा मदोरतिः।।  
विट्स्त्रंसः पित्तवमनं रक्तष्ठीवनमम्लकः।  
रक्तकोठोद्गमः पीतहरितत्वं त्वगादिषु।।  
स्वेदो निःश्वासवैगन्ध्यमतितृष्णा च पित्तजे।

**Aṣṭāṅgahrdayam, Cikitsāsthānaṃ, 1.172**

न हि ज्वरोनुबध्नाति मारुताद्यैर्विना कृतः।।

**Aṣṭāṅgahrdayam, Nidānasthānaṃ, 3.22-24**

वातलैर्कुपितो वातः शुष्कोरःकण्ठवक्त्रताम्।  
हृत्पाश्वोरःशिरःशूलं मोहक्षोभस्वरक्षयान्।।  
करोति शुष्कं कासं च महावेगरुजास्वनम्।।

**Aṣṭāṅgahrdayam, Nidānasthānaṃ, 3.26-27**

कफादुरोलपरुड्मूर्धहृदयं स्तिमितं गुरु।  
कण्ठोपलेपः सदनं पीनसच्छर्द्यरोचकाः।।  
रोमहर्षो घनस्निग्धश्चेतश्लेष्मप्रवर्तनम्।।

**Stages of Jvara**

**Carakasamhitā, Cikitsāsthānaṃ, 3.133-136**

अरुचिश्चाविपाकश्च गुरुत्वमुदरस्य च॥१३३॥  
हृदयस्याविशुद्धिश्च तन्द्रा चालस्यमेव च।  
ज्वरोऽविसर्गी बलवान् दोषाणामप्रवर्तनम्॥१३४॥  
लालाप्रसेको हल्लासः क्षुन्नाशो विरसं [१] मुखम्।  
स्तब्धसुप्तगुरुवं च गात्राणां बहुमूत्रता॥१३५॥  
न विड् जीर्णा न च ग्लानिर्ज्वरस्यामस्य लक्षणम्।

***Carakasamhitā, Cikitsāsthānaṃ, 3.137-138***

क्षुत् क्षामता लघुत्वं च गात्राणां ज्वरमार्दवम्॥१३७॥  
दोषप्रवृत्तिरष्टाहो निरामज्वरलक्षणम्॥१३८॥

**General signs of bad prognosis in a disease**

***Aṣṭāṅgahrdayam, Sūtrasthānaṃ***

अनुपक्रम एव स्यात् स्थितोऽत्यन्तविपर्यये। औत्सुक्यमोहाऽरतिकृत् दृष्टरिष्टोऽक्षनाशनः।।

**Methods and approaches to study new diseases in Ayurveda**

***Gananathasen's Siddhāntanidāna, 1.33-34***

दोषदूष्यगणेऽभिन्ने संमूर्च्छनविशेषतः। अदृष्टदेशकालादिपरिणामादनेकधाः।।  
पुराणाः प्रविलीयन्ते नवीनाः प्रादुरासते। विभिद्यन्ते स्थिताश्चाथ नृणां नानाविधाः गदाः।।

***Carakasamhitā, Cikitsāsthānaṃ, 30.291***

रोगा येऽप्यत्र नोद्दिष्टा बहुत्वान्नामरूपतः।  
तेषामप्येतदेव स्याद्दोषादीन् वीक्ष्य भेषजम्॥

***Carakasamhitā, Cikitsāsthānaṃ, 30.292***

दोषदूष्यनिदानानां विपरीतं हितं ध्रुवम्।  
उक्तानुक्तान् गदान् सर्वान् सम्यग्युक्तं नियच्छति॥२९२॥

***Aṣṭāṅgahrdayam, Sūtrasthānaṃ, 12.64-66***

विकारनामाकुशलो न जिह्वीयात् कदाचन।  
न हि सर्वविकाराणां नामतोऽस्ति ध्रुवा स्थितिः॥४४॥  
स एव कुपितो दोषः समुत्थानविशेषतः।  
स्थानान्तराणि च प्राप्य विकारान् कुरुते बहून् [१] ॥४५॥  
तस्माद्विकारप्रकृतीरधिष्ठानान्तराणि च।  
बुद्ध्वा हेतुविशेषांश्च शीघ्रं कुर्यादुपक्रमम्॥४६॥

***Mādhavanidānam, Chapters 25 (Āmavāta) and Chapter 51 (Amlapitta)***

This text describes new diseases like Āmavāta and Amlapitta.

**The clinical course and transition of Āgantujvara to Nijajvara**

***Carakasamhitā, Nidānasthānaṃ, 1.30***

अभिघाताभिषङ्गाभिचाराभिशापेभ्य आगन्तुर्हि व्यथापूर्वोऽष्टमो ज्वरो भवति।

स किञ्चित्कालमागन्तुः केवलो भूत्वा पश्चाद्दोषैरनुबध्यते।

**Cakrapāṇi on above**

किञ्चित्कालमिति स्तोककालं; केचित् त्र्यहं वदन्ति, अन्ये सप्ताहमाहुः। आगन्तौ हि सप्ताहादूर्ध्वं दोषलिङ्गानि भवन्तीति दृष्टम्।

**Aṣṭāṅghrdayam, Cikitsāsthānaṃ, 1.84**

रुक्षं हि तेजो ज्वरकृत् तेजसा रुक्षितस्य च।।

**Aṣṭāṅghrdayam, Cikitsāsthānaṃ, 1.16**

ऊष्मा पित्तादृते नास्ति ज्वरं नास्त्यूष्मणा विना।।

**Description of factors involved in disease resistance and innate strength of the body**

**Carakasamhitā, Nidānasthānaṃ, 3.4**

इह खलु निदानदोषदूष्यविशेषेभ्यो विकारविघातभावाभावप्रतिविशेषा भवन्ति।

यदा ह्येते त्रयो निदानादिविशेषाः परस्परं नानुबध्नन्त्यथवा [१] कालप्रकर्षादबलीयांसोऽथवाऽनुबध्नन्ति न तदा विकाराभिनिर्वृत्तिः, चिराद्वाऽप्यभिनिर्वर्तन्ते, तनवो वा भवन्त्यथोक्तसर्वलिङ्गा वा; विपर्यये विपरीताः; इति सर्वविकारविघातभावाभावप्रतिविशेषाभिनिर्वृत्तिहेतुर्भवत्युक्तः॥४॥

**Cakrapāṇi on Carakasamhitā, Sūtrasthānaṃ, 28.6**

व्याधिक्षमत्वं व्याधिबलविरोधित्वं व्याध्युत्पादप्रतिबन्धकत्वमिति यावत्।

**Aṣṭāṅghrdayam, Sūtrasthānaṃ, 11.37**

ओजस्तु तेजो धातूनां शुक्रान्तानां परं स्मृतम्।।

**Aṣṭāṅghrdayam, Sūtrasthānaṃ, 11.38**

यन्नाशे नियतं नाशो यस्मिंस्तिष्ठति तिष्ठति।।

**Aṣṭāṅghrdayam, Cikitsāsthānaṃ, 1.3**

लङ्घनैर्क्षीपिते दोषे दीप्तेनौ लाघवे सति।

स्वास्थ्यं क्षुत्तृट् रुचिः पक्तिर्बलमोजश्च जायते।।

**Aṣṭāṅghrdayam, Cikitsāsthānaṃ, 1.84**

देहधात्वबलत्वाच्च ज्वरो जीर्णोऽनुवर्तते।

**Aṣṭāṅghrdayam, Cikitsāsthānaṃ, 1.95**

बलं ह्यलं दोषहरं परं तच्च बलप्रदम्।।



***Aṣṭāṅgahrdayam, Cikitsāsthānaṃ, 1.2***

बलं यत्नेन पालयन्। बलाधिष्ठानमारोग्यं यदर्थोयं क्रियाक्रमः।।

***Carakasamhitā, Sūtrasthānaṃ, 17.117***

प्राकृतस्तु बलं श्लेष्मा विकृतो मल उच्यते।

स चैवौजः स्मृतः काये स च पाप्मोपदिश्यते॥११७॥

**Description of the sites of manifestation of disease**

***Carakasamhitā, Vimānasthānaṃ, 5.8***

तत्र प्राणवहानां स्रोतसां हृदयं मूलं महास्रोतश्च, प्रदुष्टानां तु खल्वेषामिदं विशेषविज्ञानं भवति; तद्यथा- अतिसृष्टमतिबद्धं कुपितमल्पाल्पमभीक्षणं वा सशब्दशूलमुच्छ्वसन्तं दृष्ट्वा प्राणवहान्यस्य स्रोतांसि प्रदुष्टानीति विद्यात्।

***Carakasamhitā, Sūtrasthānaṃ, 11.42***

तत्र शाखा रक्तादयो धातवस्त्वक् च, स बाह्यो रोगमार्गः; मर्माणि पुनर्बस्तिहृदयमूर्धादीनि, अस्थिसन्धयोऽस्थिसंयोगास्तत्रोपनिबद्धाश्च स्नायुकण्डराः [१] , स मध्यमो रोगमार्गः; कोष्ठः पुनरुच्यते महास्रोतः शरीरमध्यं महानिम्नमामपक्वाशयश्चेति पर्यायशब्दैस्तन्त्रे, स रोगमार्ग आभ्यन्तरः॥४८॥

***Carakasamhitā, Sūtrasthānaṃ, 11.43***

तत्र, गण्डपिडकालज्यपचीचर्मकीलाधिमांसमषककुष्ठव्यङ्गादयो विकारा बहिर्मार्गजाश्च विसर्पश्चयथुगुल्माशोविद्रध्यादयः शाखानुसारिणो भवन्ति रोगाः; पक्षवधग्रहापतानकार्दितशोषराजयक्ष्मास्थिसन्धिशूलगुदभ्रंशादयः शिरोहृद्वस्तिरोगादयश्च मध्यममार्गानुसारिणो भवन्ति रोगाः; ज्वरातीसारच्छर्दलसकविसूचिकाकासश्वासहिक्कानाहोदरप्लीहादयोऽन्तर्मार्गजाश्च विसर्पश्चयथुगुल्माशोविद्रध्यादयः कोष्ठानुसारिणो भवन्ति रोगाः॥४९॥

***Aṣṭāṅgahrdayam, Nidānasthānaṃ, 4.3-4***

कफोपरुद्धगमनः पवनो विष्वगास्थितः।

प्राणोदकान्वाहीनि दुष्टः स्रोतांसि दूषयन्।।

उरस्थः कुरुते श्वासमामाशयसमुद्भवम्।।

**Description of Āma**

***Vijayarakṣita, Śrīkaṅṭhadatta on Mādhavanidānaṃ, 25.1-5***

आममन्तरसं केचित् केचित्तु मलसञ्चयम्।

प्रथमां दोषदुष्टिं वा केचिदामं प्रचक्षते।।

***Aṣṭāṅgahrdayam, Sūtrasthānaṃ, 13.26***

अन्ये दोषेभ्य एवाति दुष्टेभ्योन्योन्यमूर्च्छनात्।  
कोद्रवेभ्यो विषस्यैव वदन्त्यामस्य संभवः।।

**Descriptions related to pathogenesis of disease**

***Mādhavanidānaṃ, 1.5-6***

प्राग्रूपं येन लक्ष्यते ॥५॥  
उत्पित्सुरामयो दोषविशेषेणानधिष्ठितः |  
लिङ्गमव्यक्तमल्पत्वाद् व्याधीनां [१] तद्यथायथम् ॥

***Carakasamhitā, Vimānasthānaṃ 4.7***

गूढलिङ्गं व्याधिमुपशयानुपशयाभ्यां ॥

***Cakrapāṇi on Carakasamhitā, Cikitsāsthānaṃ 3.89-109***

सन्निपातज्वरस्योर्ध्वमिति अत्रोर्ध्वशब्देनाधिकवाचिना प्रकृतिसमसमवायारब्धसन्निपातज्वराद्यान्यधिकानि  
विकृतिविषमसमवायारब्धज्वरस्य लक्षणानि, तानि वक्ष्यामीत्यर्थ इति केचिद्व्याख्यानयन्ति; यदिह  
सास्त्रावकलुषनिर्भुग्नलोचनत्वादि वक्तव्यं न तत् पृथग्वातादिज्वरोक्तलक्षणमेलके भवति, किन्तु  
विकृतिविषमसमवायारब्धे ज्वरे संयोगमहिम्ना भवतीति।

***Caraksamhitā, Cikitsāsthānaṃ, 21.40***

उपद्रवस्तु खलु रोगोत्तरकालजो रोगाश्रयो रोग एव स्थूलोऽणुर्वा, रोगात् पश्चाज्जायत इत्युपद्रवसञ्ज्ञः।  
तत्र प्रधानो व्याधिः, व्याधेर्गुणभूत [१] उपद्रवः, तस्य प्रायः प्रधानप्रशमे प्रशमो भवति।  
स तु पीडाकरतरो भवति पश्चादुत्पद्यमानो व्याधिपरिक्लिष्टशरीरत्वात्; तस्मादुपद्रवं त्वरमाणोऽभिबाधेत॥४०॥

***Mādhavanidānaṃ, 2.33***

कुर्याच्चतुर्थकं घोरमन्तकं रोगसङ्करम् ॥३३॥

**Commentary of Vijayarakṣita on above - रोगसङ्करम् अनेकरोगसङ्कुलम्॥**

***Carakasamhitā, Sūtrasthānaṃ, 18.5***

ते पुनर्यथास्वं हेतुव्यञ्जनैरादावुपलभ्यन्ते निजव्यञ्जनैकदेशविपरीतैः
