# Supplementary material
Source: PubMed Central journal article supplement (PMC7290222)
Supplement: mmc2.pdf [file mmc2.pdf]

## Supplementary Material 2

### Patient Data of COVID-19 patients from Medanta Hospital

Supplementary Table 1 - SYMPTOM PROFILE OF COHORT OF COVID-19 PATIENTS

|                                   | 1                        | 2 | 3 | 4 | 5 | 6        | 7 | 8 | 9 | 10 | 11 | 12 | 13     | 14     |
|-----------------------------------|--------------------------|---|---|---|---|----------|---|---|---|----|----|----|--------|--------|
| <b>Cough (100%)</b>               | √                        | √ | √ | √ | √ | √        | √ | √ | √ | √  | √  | √  | √      | √      |
| <b>Throat Pain (86.71%)</b>       | √                        | √ |   | √ | √ | √        | √ | √ | √ | √  | √  |    | √      | √      |
| <b>Fever (78.57%)</b>             | √                        |   | √ | √ | √ | √        | √ | √ | √ |    | √  |    | √      | √      |
| <b>Headache (64.29%)</b>          |                          | √ |   | √ |   | √        | √ |   |   | √  | √  |    | √      | √      |
| <b>Myalgia (57.14%)</b>           |                          | √ | √ |   |   |          | √ | √ |   | √  | √  | √  | √      |        |
| <b>Dyspnoea (28.58%)</b>          |                          |   |   | √ |   | √        |   |   |   |    |    |    | √      | √      |
| <b>Insomnia (28.58%)</b>          |                          |   |   | √ |   | √        |   |   |   |    |    |    | √      | √      |
| <b>Giddiness (21.43%)</b>         |                          |   |   | √ |   | √        |   |   |   |    |    |    | √      |        |
| <b>Loss of Appetite (14.29%)</b>  |                          |   |   |   |   |          |   |   |   |    |    |    | √      | √      |
| <b>Fatigue (14.29%)</b>           |                          |   |   |   |   |          |   |   |   |    |    |    | √      | √      |
| <b>Severe Anxiety (14.29%)</b>    |                          |   |   |   |   | √        |   |   |   |    |    |    | √      |        |
| <b>Nasal Obstruction (14.29%)</b> |                          |   |   | √ |   | √        |   |   |   |    |    |    |        |        |
| <b>Nasal discharge (7.14%)</b>    |                          |   |   | √ |   |          |   |   |   |    |    |    |        |        |
| <b>Nausea (7.14%)</b>             |                          |   |   |   |   |          |   |   |   |    |    |    | √      |        |
| <b>Diarrhoea (7.14%)</b>          |                          |   |   |   |   |          |   |   |   |    |    |    | √      |        |
| <b>Arthralgia (7.14%)</b>         |                          |   |   |   |   |          |   |   |   |    |    | √  |        |        |
| <b>Cold Chills (7.14%)</b>        |                          |   |   |   |   | √        |   |   |   |    |    |    |        |        |
| <b>General Edema (7.14%)</b>      |                          |   |   |   |   | √        |   |   |   |    |    |    |        |        |
| <b>Delerium (7.14%)</b>           |                          |   |   |   |   | √        |   |   |   |    |    |    |        |        |
| <b>Confusion (7.14%)</b>          |                          |   |   |   |   | √        |   |   |   |    |    |    |        |        |
|                                   | <b>CO-MORBIDITIES</b>    |   |   |   |   |          |   |   |   |    |    |    |        |        |
| <b>Hypertension (42.86%)</b>      | √                        | √ | √ |   |   | √        |   |   | √ |    |    |    |        | √      |
| <b>Cardiac Disease (21.43%)</b>   |                          |   | √ |   |   | √        |   |   | √ |    |    |    |        |        |
| <b>Diabetes (7.14%)</b>           |                          | √ |   |   |   |          |   |   |   |    |    |    |        |        |
| <b>BPH (7.14%)</b>                |                          |   |   |   |   |          |   |   |   |    |    |    | √      |        |
|                                   | <b>HABITS</b>            |   |   |   |   |          |   |   |   |    |    |    |        |        |
| <b>Smoking (21.43%)</b>           |                          |   |   |   |   |          |   |   | √ | √  |    |    |        | √      |
| <b>Clinical Course</b>            | Severe                   |   |   |   |   | Critical |   |   |   |    |    |    | Severe | Severe |
| <b>Outcome</b>                    | R                        | R | R | R | R | D        | R | R | R | R  | R  | R  | R      | R      |
| <b>Abbreviations</b>              | R = Recovered, D = Death |   |   |   |   |          |   |   |   |    |    |    |        |        |

**Supplementary Table 2 - ANALYSIS OF CLINICAL SYMPTOMS OF A CLUSTER OF COVID-19 PATIENTS**

| Patient | Age | Sex | Co-Morbidity                                | Baseline     | Clinical Course                                                                                                                                                           | Progress                             | Active Medications                                                                                                                                                                                                                                                                                                                                                                                                                                                                                                                                                                                                                                                                                                                                                                                                                                                                                                                                                                                                                          | Concomitant Medications Continued                                       | Length of Stay | Test Negative on Day               | Outcome R-Recovered D-Death |
|---------|-----|-----|---------------------------------------------|--------------|---------------------------------------------------------------------------------------------------------------------------------------------------------------------------|--------------------------------------|---------------------------------------------------------------------------------------------------------------------------------------------------------------------------------------------------------------------------------------------------------------------------------------------------------------------------------------------------------------------------------------------------------------------------------------------------------------------------------------------------------------------------------------------------------------------------------------------------------------------------------------------------------------------------------------------------------------------------------------------------------------------------------------------------------------------------------------------------------------------------------------------------------------------------------------------------------------------------------------------------------------------------------------------|-------------------------------------------------------------------------|----------------|------------------------------------|-----------------------------|
| P1      | 64  | F   | Hypertension                                | Mild         | Cough, throat pain, fever                                                                                                                                                 | ARDS, Oxygen support required        | Alprazolam, Alfuzosin, Diclofenac Gel, Hydrochlorothiazide, Olmesartan, Nebivolol, Tramadol + Paracetamol, Vitamin C                                                                                                                                                                                                                                                                                                                                                                                                                                                                                                                                                                                                                                                                                                                                                                                                                                                                                                                        | Antihypertensive medicines                                              | 20             | 17                                 | R                           |
| P2      | 66  | M   | Hypertension, Diabetes                      | Asymptomatic | Cough, throat pain, myalgia, headache                                                                                                                                     |                                      | Amlodipine, Atorvastatin, Liquid Paraffin, Metformin Hcl., Magnesium Hydroxide and Sodium picosulphate, Multivitamins, Vitamin C                                                                                                                                                                                                                                                                                                                                                                                                                                                                                                                                                                                                                                                                                                                                                                                                                                                                                                            | Antidiabetic medicines                                                  | 20             | 17                                 | R                           |
| P3      | 45  | F   | Hypertension, Cardiac disease               | Mild         | Intermittent fever, cough, myalgia                                                                                                                                        |                                      | Acetylsalicylic acid, Alprazolam, Diclofenac Gel, Hydrogen Peroxide, Pantoprazole, Sodium chloride Drops, Telmisartan and hydrochlorothiazide, Vitamin C                                                                                                                                                                                                                                                                                                                                                                                                                                                                                                                                                                                                                                                                                                                                                                                                                                                                                    | Antihypertensive medicines                                              | 27             | 17                                 | R                           |
| P4      | 68  | F   |                                             | Asymptomatic | Intermittent fever, cough, dyspnoea, giddiness, headache, nasal obstruction, nasal discharge, throat pain, insomnia                                                       |                                      | Azithromycin, Amlodipine, Hydrochlorothiazide, Levocetirizine, Prednisolone, Paracetamol, Potassium Chloride Inj, Propranolol, Vitamin C                                                                                                                                                                                                                                                                                                                                                                                                                                                                                                                                                                                                                                                                                                                                                                                                                                                                                                    | Antihypertensives<br>Amlodipine<br>Atorvastatin<br>Propranolol          | 20             | 17                                 | R                           |
| P5      | 70  | M   |                                             | Asymptomatic | Intermittent fever, cough, throat pain,                                                                                                                                   |                                      | Alprazolam, Atorvastatin, Vitamin C                                                                                                                                                                                                                                                                                                                                                                                                                                                                                                                                                                                                                                                                                                                                                                                                                                                                                                                                                                                                         |                                                                         | 20             | 17                                 | R                           |
| P6      | 74  | M   | Hypertension, Cardiac disease               | Mild         | Intermittent fever, cough, dyspnoea (mixed type), nasal obstruction, throat pain, oedema, insomnia, severe anxiety, delirium, confusion, giddiness, headache, cold chills | ARDS, Hypoxia, Critical, Ventilator  | Acetazolamide, Acetylcysteine, Adrenaline, Albumin 20, Alprazolam, Amiodarone, Anidulafungin, Atracurium, Atropine, Augmentin, Pheniramine maleate, Aztreonam, Calcium gluconate, Cefazidime + avibactam, Clotrimazole, Dexamethasone, Dexmedetomidine, Salbutamol sulphate and ipratropium bromide, Probiotic, Enoxaparin, Ensure plus, Bacillus clausii, Ephedrine, Furosemide, Glutaverge, Heparin, Hydrochlorothiazide, Hydrocortisone, Hydroxychloroquine, Insugen, Ivabradine, Lactulose, Levofloxacin, Lignocaine 2% jelly, Loperamide, Magnesium sulphate 50%, Mephentermine, Meropenem, Metronidazole, Midazolam, Mistabron, Modafinil, Montelukast, Nitroglycerin, Noradrenaline, Omega 3 fatty acids, Pantoprazole, Paracetamol inj, Piperacillin and tazobactam, Polymyxin b, Potassium chloride, Profol, Providac, Refresh tears, Ritonavir-lopinavir, Smofkabiven, Sodium mercapb ethan, Spironolactone, Teicoplanin, Tocilizumab, Trace elements, Tranexamic acid, Tropicamide + phenyl pyridine drops, Vitamin C Vitamin D3 |                                                                         | 37             | 18, but positive again on 24th day | D                           |
| P7      | 70  | F   |                                             | Mild         | Cough, throat pain, myalgia, headache, fever                                                                                                                              |                                      | Atorvastatin, Diclofenac gel, Etoricoxib, Paracetamol, Vitamin C                                                                                                                                                                                                                                                                                                                                                                                                                                                                                                                                                                                                                                                                                                                                                                                                                                                                                                                                                                            | Antihypertensive medicines                                              | 18             | 15                                 | R                           |
| P8      | 65  | F   |                                             | Mild         | Fever, cough, throat pain, myalgia, headache                                                                                                                              |                                      | Anesthetic antacid, Bacillus clausii, Esomeprazole, Liquid paraffin + MgOH2, Lansoprazole, Pantoprazole, Sodium chloride nasal spray, Vitamin C                                                                                                                                                                                                                                                                                                                                                                                                                                                                                                                                                                                                                                                                                                                                                                                                                                                                                             | Antihypertensive medicines                                              | 20             | 17                                 | R                           |
| P9      | 71  | F   | Hypertension (H/o smoking), Cardiac disease | Mild         | Cough, throat pain, fever                                                                                                                                                 |                                      | Amlodipine, Apixaban, Bacillus clausii, Diclofenac gel, Flecainide, Olmesartan, Paracetamol, Vitamin C                                                                                                                                                                                                                                                                                                                                                                                                                                                                                                                                                                                                                                                                                                                                                                                                                                                                                                                                      | Antihypertensive medicines                                              | 20             | 17                                 | R                           |
| P10     | 64  | M   | (H/o smoking)                               | Mild         | Cough, throat pain, myalgia, headache                                                                                                                                     |                                      | Alprazolam, Sodium Chloride (Flexi Drip), Vitamin C                                                                                                                                                                                                                                                                                                                                                                                                                                                                                                                                                                                                                                                                                                                                                                                                                                                                                                                                                                                         |                                                                         | 20             | 17                                 | R                           |
| P11     | 73  | F   |                                             | Mild         | Fever, cough, throat pain, myalgia, headache                                                                                                                              |                                      | Polyethylene glycol drop, Paracetamol, Pantoprazole, Vitamin C                                                                                                                                                                                                                                                                                                                                                                                                                                                                                                                                                                                                                                                                                                                                                                                                                                                                                                                                                                              |                                                                         | 20             | 17                                 | R                           |
| P12     | 77  | F   |                                             | Mild         | Cough, myalgia                                                                                                                                                            |                                      | Ondansetron, Rabeprazole, Vitamin C                                                                                                                                                                                                                                                                                                                                                                                                                                                                                                                                                                                                                                                                                                                                                                                                                                                                                                                                                                                                         |                                                                         | 20             | 17                                 | R                           |
| P13     | 68  | M   | BPH                                         | Asymptomatic | Intermittent fever, cough, dyspnoea (mixed type), nausea, diarrhoea, loss of appetite, fatigue, insomnia, severe anxiety, headache, myalgia, arthralgia, giddiness        | ARDS, Hypoxia, Oxygen Support needed | Acebrophylline, Amoxicillin + Clavulanate Inj., Anesthetic Antacid, Azithromycin, Bacillus clausii, Chlorpheniramine Maleate, Chloroquine, Clonazepam, DNS - Aqua Plus Inj., Hydroxychloroquine, Hydrocortisone Inj., Liquid paraffin + MgOH2, Montelukast sodium, NaCl Drops, Ondansetron Inj, Oseltamivir, Pheniramine, Prednisolone, Rabeprazole, Ritonavir + Lopinavir, Sodium Chloride (Flexi Drip), Tocilizumab Inj., Tamsulosin, Vitamin C                                                                                                                                                                                                                                                                                                                                                                                                                                                                                                                                                                                           |                                                                         | 20             | 17                                 | R                           |
| P14     | 73  | M   | Hypertension (H/o smoking)                  | Asymptomatic | Fever, cough, throat pain, dyspnoea, loss of appetite, fatigue, insomnia, headache,                                                                                       | ARDS                                 | Anaesthetic antacid Syp, Alprazolam, Ondansetron, Paracetamol, Pantoprazole, Rabeprazole, Ritonavir + Lopinavir,                                                                                                                                                                                                                                                                                                                                                                                                                                                                                                                                                                                                                                                                                                                                                                                                                                                                                                                            | Antihypertensive medicines, ARB Statin, Alprazolam, Trimebutine Maleate | 27             | 24                                 | R                           |
